# Supplementary material for: Genomic, Molecular, and Phenotypic Characterization of Arthrobacter sp. OVS8, an Endophytic Bacterium Isolated from and Contributing to the Bioactive Compound Content of the Essential Oil of the Medicinal Plant Origanum vulgare L.
Source: MDPI journal article supplement (doi:10.3390/ijms24054845), 2023-03-02

## Supplementary Material

**Table S1.** Average Nucleotide Identity (ANI) analysis results. Only the first 10 reference genomes showing the higher ANI values were here reported.

| Reference genome             | Species                     | ANI value (%) | Bidirectional Fragment Mappings | Total Query Fragments |
|------------------------------|-----------------------------|---------------|---------------------------------|-----------------------|
| GCF_019977335_1_ASM1997733v1 | Arthrobacter sp. NicSoilB4  | 89.5916       | 1102                            | 1391                  |
| GCF_001750145_1_ASM175014v1  | Arthrobacter sp. U41        | 88.0.188      | 1011                            | 1391                  |
| GCF_004798705_1_ASM479870v1  | Arthrobacter sp. PAMC25564  | 84.7887       | 872                             | 1391                  |
| GCF_007858535_1_ASM785853v1  | Arthrobacter sp. UKPF54-2   | 84.7483       | 890                             | 1391                  |
| GCF_947090775_1_MM222        | Pseudarthrobacter sp. MM222 | 84.6723       | 961                             | 1391                  |
| GCF_019977355_1_ASM1997735v1 | Arthrobacter sp. NicSoilB8  | 84.3877       | 969                             | 1391                  |
| GCF_005937985_2_ASM593798v2  | Arthrobacter sp. KBS0702    | 84.3611       | 875                             | 1391                  |
| GCF_005280255_1_ASM528025v1  | Arthrobacter sp. 24S4-2     | 82.8444       | 841                             | 1391                  |
| GCF_000196235_1_ASM19623v1   | Arthrobacter sp. FB24       | 82.6295       | 858                             | 1391                  |
| GCF_019443425_1_ASM1944342v1 | Arthrobacter sp. PAMC25284  | 82.4347       | 782                             | 1391                  |

**Table S2.** Results of the Type Strain Genome Server (TYGS) species identification routine.

| Query strain          | Conclusion            |
|-----------------------|-----------------------|
| Arthrobacter sp. OVS8 | Potential new species |

**Table S3.** Pairwise comparisons of *Arthrobacter* sp. OVS8 genome vs. type strain genomes obtained with the TYGS platform. The following table contains the pairwise digital DNA-DNA hybridization (dDDH) values between *Arthrobacter* sp. OVS8 genome and the selected type strain genomes. The dDDH values are provided along with their confidence intervals (C.I.) for the three different Genome Blast Distance Phylogeny (GBDP) formulas: formula d0, length of all high-scoring segment pair (HSPs) divided by total genome length; formula d4, sum of all identities found in HSPs divided by overall HSP length; formula d6, sum of all identities found in HSPs divided by total genome length.

| Subject strain                                 | dDDH (d0, %) | C.I. (d0, in %) | dDDH (d4, %) | C.I. (d4, in %) | dDDH (d6, %) | C.I. (d6, in %) | G+C content difference (%) |
|------------------------------------------------|--------------|-----------------|--------------|-----------------|--------------|-----------------|----------------------------|
| Pseudarthrobacter albicanus NJ-Z5              | 31,3         | [27.9 - 34.9]   | 27,1         | [24.7 - 29.5]   | 29,2         | [26.3 - 32.3]   | 0,06                       |
| Arthrobacter oryzae DSM 25586                  | 36           | [32.7 - 39.6]   | 25,9         | [23.6 - 28.4]   | 32,5         | [29.6 - 35.6]   | 0,04                       |
| Pseudarthrobacter psychrotolerans YJ56         | 22,7         | [19.4 - 26.3]   | 23,4         | [21.2 - 25.9]   | 21,8         | [19.0 - 24.8]   | 2,4                        |
| Arthrobacter pascens DSM 20545                 | 24,6         | [21.3 - 28.2]   | 23,4         | [21.1 - 25.9]   | 23,3         | [20.5 - 26.4]   | 1,45                       |
| Pseudarthrobacter humi RMG13                   | 23,9         | [20.6 - 27.5]   | 23,2         | [20.9 - 25.7]   | 22,7         | [19.9 - 25.8]   | 2,06                       |
| Arthrobacter globiformis NBRC 12137            | 23           | [19.7 - 26.6]   | 23,2         | [20.9 - 25.7]   | 22           | [19.2 - 25.1]   | 0,93                       |
| Pseudarthrobacter sulfonivorans ALL            | 22,6         | [19.3 - 26.2]   | 23,1         | [20.8 - 25.6]   | 21,7         | [18.9 - 24.7]   | 2,03                       |
| Pseudarthrobacter siccitolerans 4J27           | 22           | [18.8 - 25.7]   | 22,8         | [20.5 - 25.2]   | 21,2         | [18.4 - 24.2]   | 2,01                       |
| Arthrobacter cavernae PO-11                    | 22,8         | [19.5 - 26.4]   | 22,8         | [20.6 - 25.3]   | 21,7         | [19.0 - 24.8]   | 0,97                       |
| Pseudarthrobacter scleromae CGMCC 1.3601       | 22,6         | [19.3 - 26.2]   | 22,7         | [20.4 - 25.1]   | 21,6         | [18.8 - 24.7]   | 1,16                       |
| Arthrobacter nitrophenolicus SJConT            | 22,7         | [19.4 - 26.3]   | 22,7         | [20.5 - 25.2]   | 21,7         | [18.9 - 24.7]   | 0,91                       |
| Pseudarthrobacter polychromogenes CGMCC 1.1927 | 22,2         | [18.9 - 25.8]   | 22,7         | [20.4 - 25.1]   | 21,3         | [18.5 - 24.3]   | 1,33                       |
| Arthrobacter nitrophenolicus DSM 23165         | 22,9         | [19.6 - 26.5]   | 22,6         | [20.4 - 25.1]   | 21,8         | [19.0 - 24.9]   | 0,9                        |
| Pseudarthrobacter phenanthrenivorans Sphe3     | 21,9         | [18.6 - 25.5]   | 22,6         | [20.4 - 25.1]   | 21           | [18.3 - 24.1]   | 1,78                       |
| Pseudarthrobacter enclensis NIO-1008           | 22,7         | [19.4 - 26.4]   | 22,3         | [20.0 - 24.7]   | 21,6         | [18.8 - 24.7]   | 0,05                       |

**Figure S1.** Whole-genome sequence-based GBDP tree. Tree inferred with FastME 2.1.6.1 from GBDP distances calculated from genome sequences. The branch lengths are scaled in terms of GBDP distance formula d5. The numbers above branches are GBDP pseudo-bootstrap support values > 60 % from 100 replications, with an average branch support of 96.3 %. The tree was rooted at the midpoint.

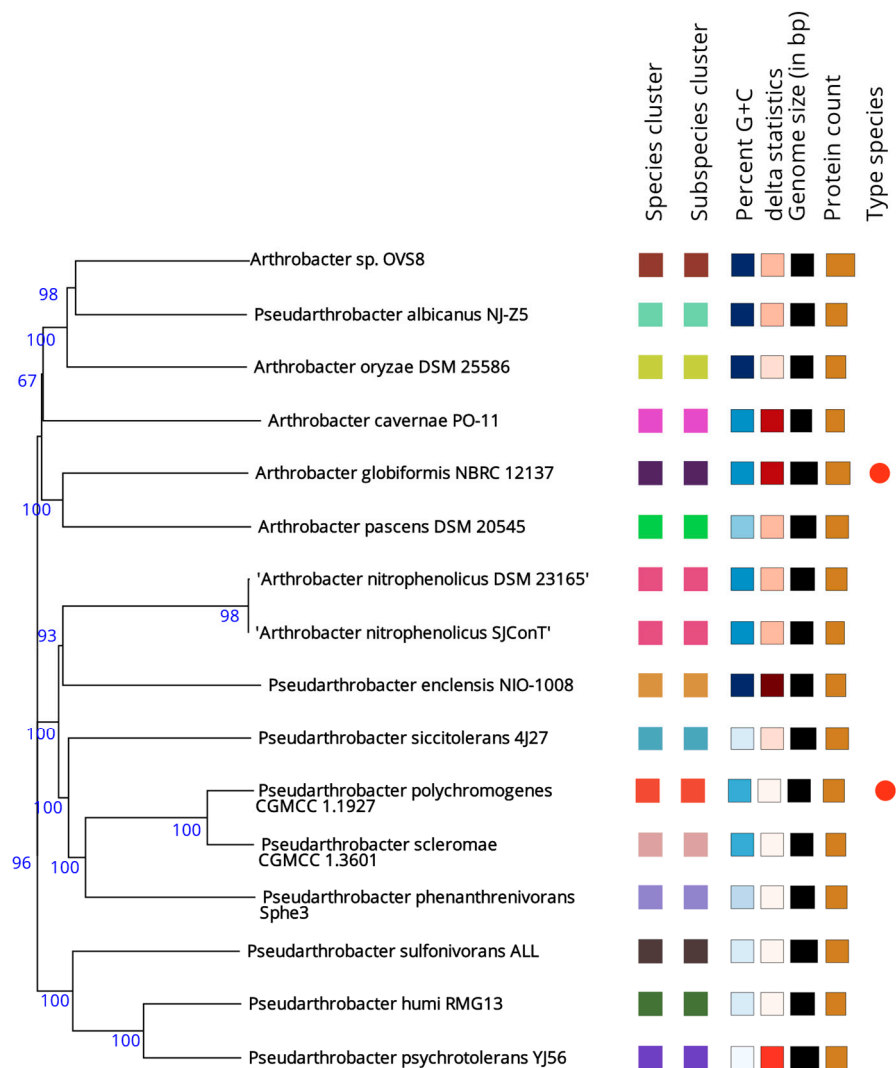

**Figure S2.** 16S rDNA gene sequence-based GBDP tree. Tree inferred with FastME 2.1.6.1 from GBDP distances calculated from 16S rDNA gene sequences. The branch lengths are scaled in terms of GBDP distance formula d5. The numbers above branches are GBDP pseudo-bootstrap support values > 60 % from 100 replications, with an average branch support of 55.8 %. The tree was rooted at the midpoint.

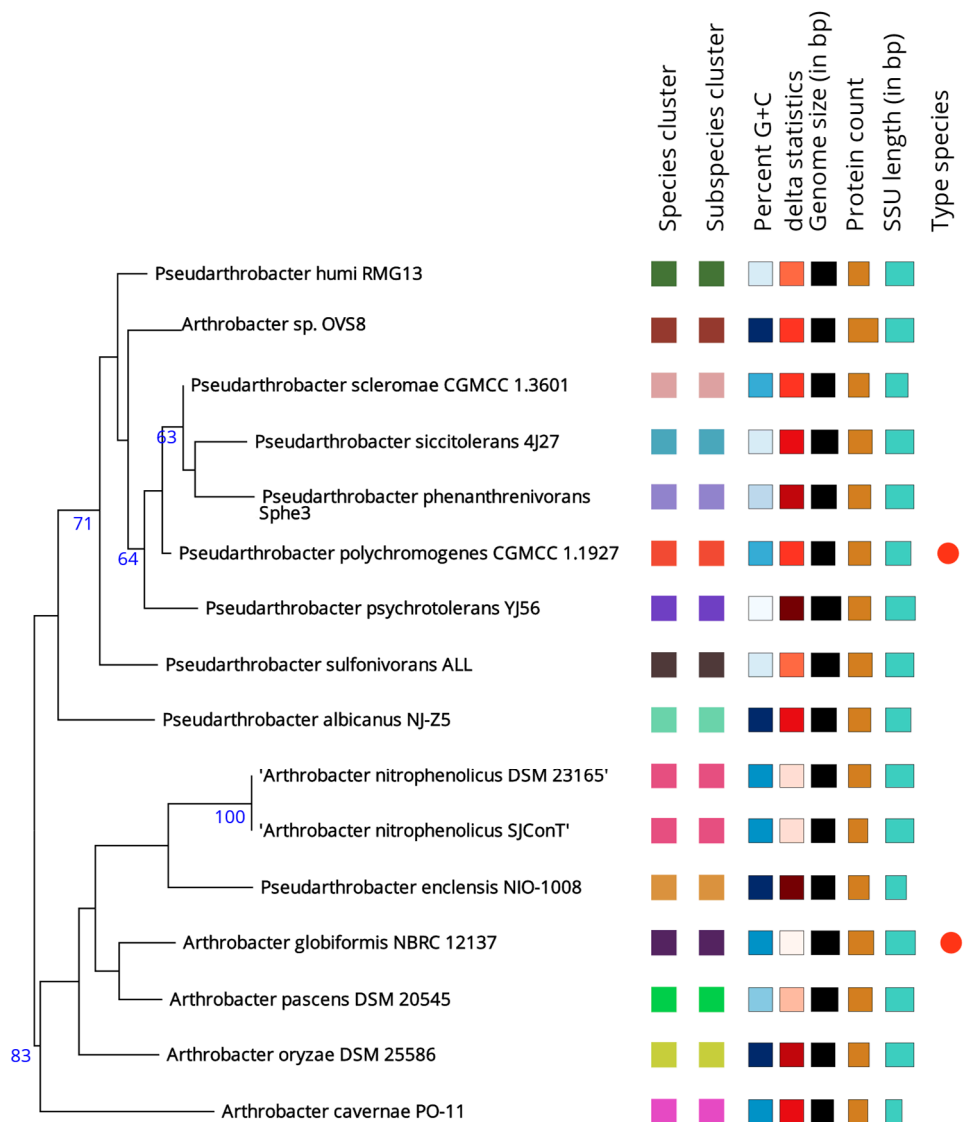

Supplement: s1 [file s1]
